# Supplementary material for: Preparation of a hybrid Cu2O/CuMoO4 nanosheet electrode for high-performance asymmetric supercapacitors
Source: Royal Society of Chemistry journal article supplement (doi:10.1039/c6ta08670e), 2016-01-01
Supplement: c6ta08670e1.pdf [file c6ta08670e1.pdf]

## Supporting Information

### **Preparation of Hybrid of Hybrid Cu<sub>2</sub>O/CuMoO<sub>4</sub> Nanosheet Electrode for High-performance Asymmetric Supercapacitors**

*Dongwei Du,<sup>a</sup> Rong Lan,<sup>a</sup> Wei Xu,<sup>a</sup> Richard Beanland,<sup>b</sup> Huanting Wang<sup>c</sup> and Shanwen Tao<sup>\*,a,c</sup>*

<sup>a</sup>School of Engineering, University of Warwick, Coventry CV4 7AL, UK

<sup>b</sup>Department of Physics, University of Warwick, Coventry CV4 7AL, UK

<sup>c</sup>Department of Chemical Engineering, Monash University, Clayton, Victoria 3800, Australia

\*Corresponding Author

E-mail: S.Tao.1@warwick.ac.uk

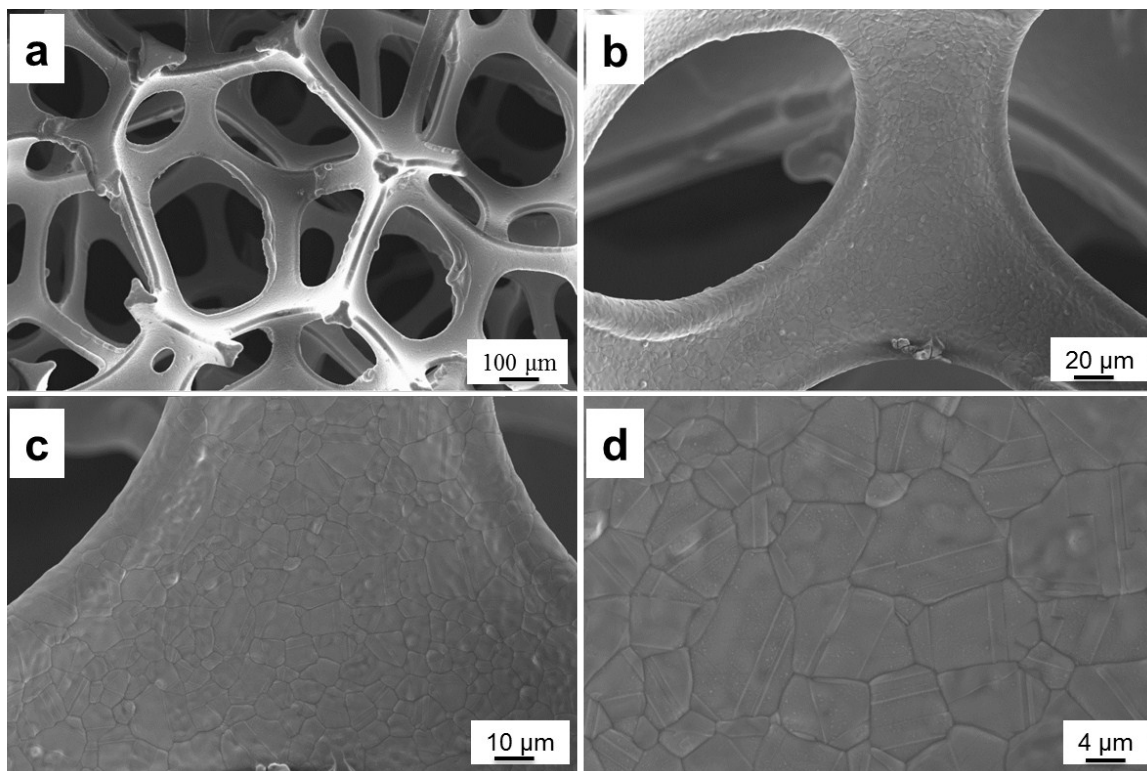

**Fig. S1.** Typical SEM images of bare Ni foam.

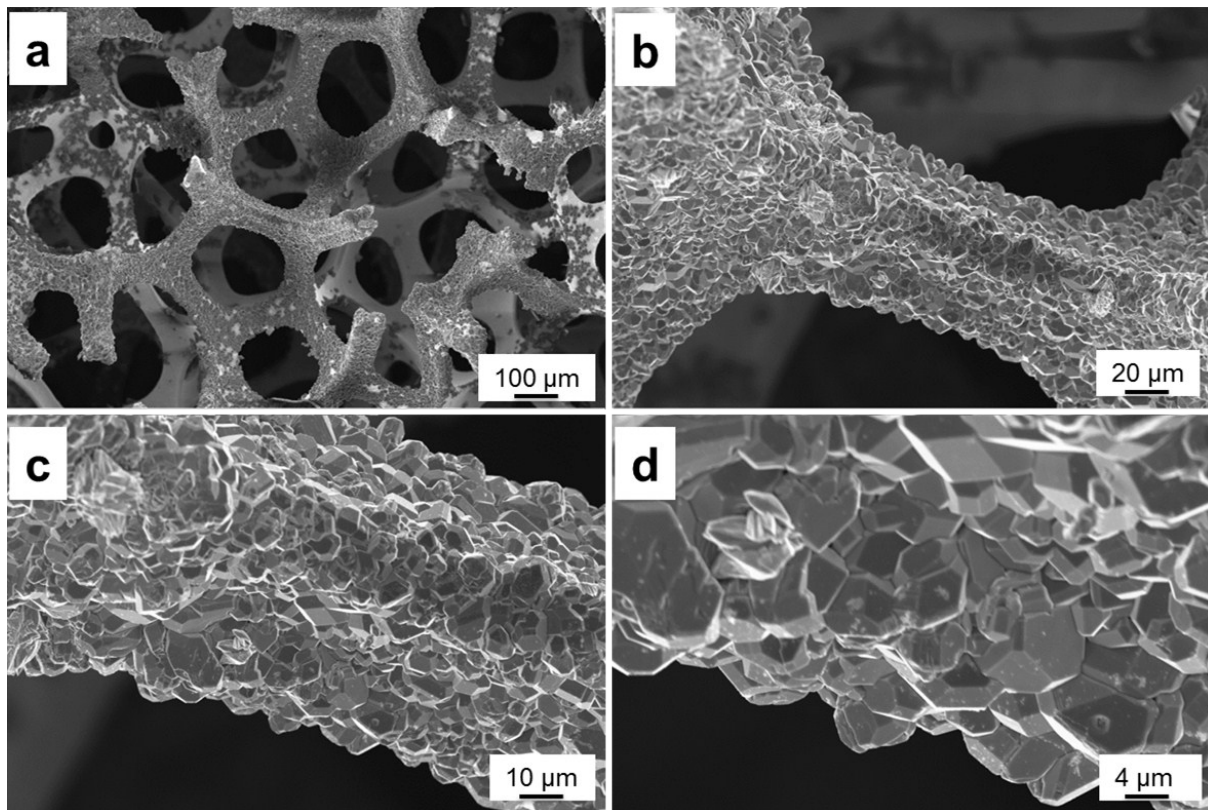

**Fig. S2.** Typical SEM images of Cu<sub>2</sub>O grown on Ni foam.

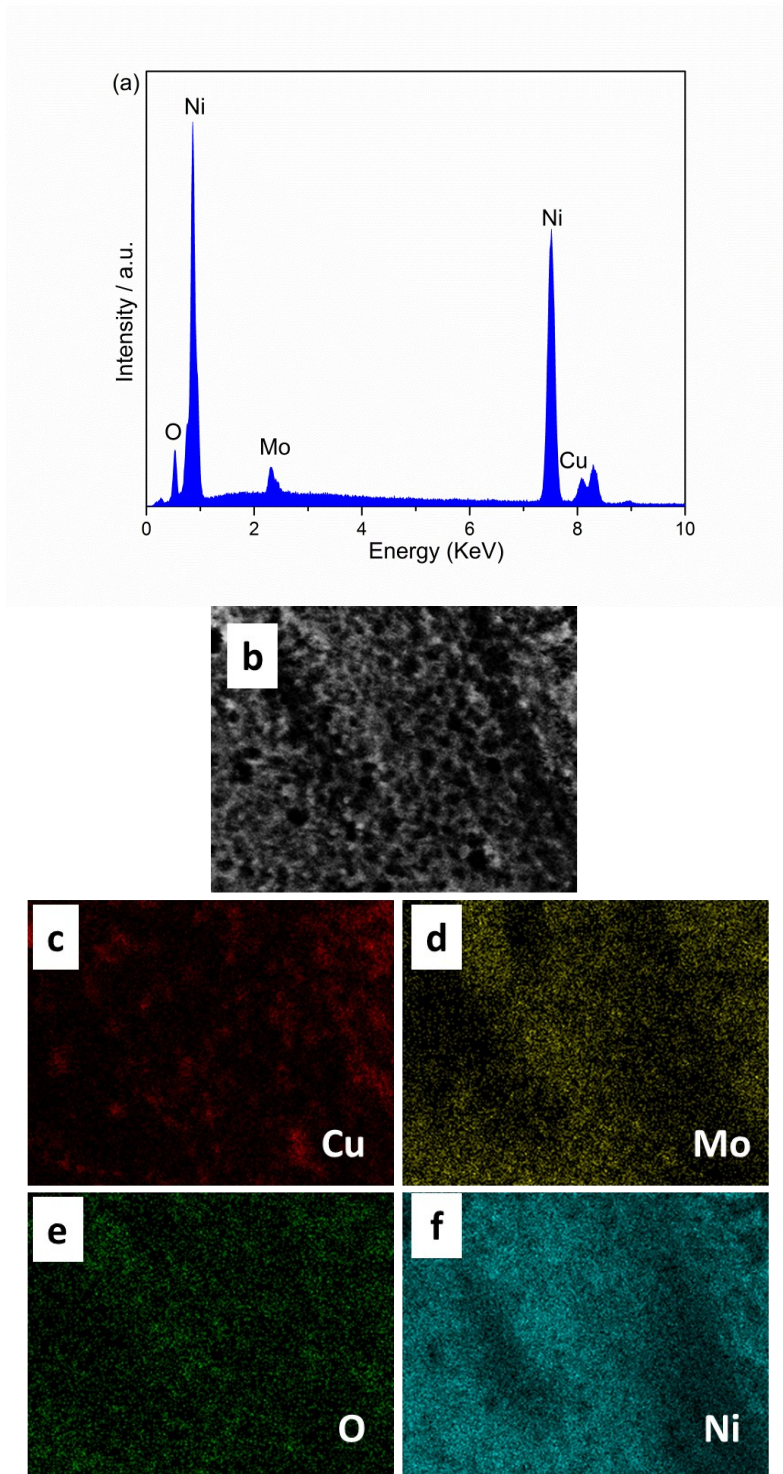

**Fig. S3.** a) EDX spectrum of the hybrid nanosheets grown on Ni foam and b-f) the mapping results according to the position.

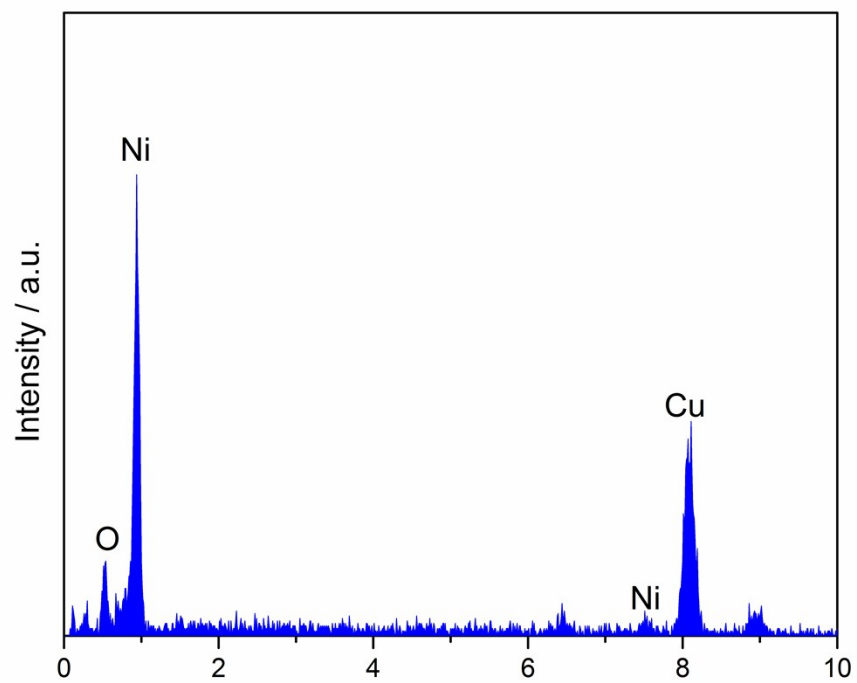

**Fig. S4.** a) EDX spectrum of the  $\text{Cu}_2\text{O}$  grown on Ni foam.

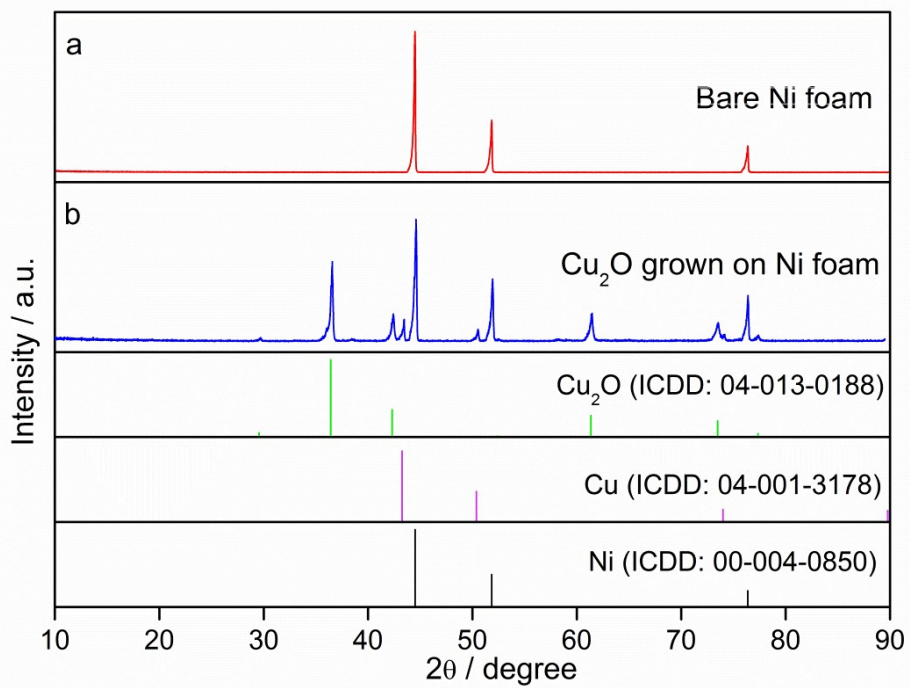

**Fig. S5.** XRD patterns of a) bare Ni foam and b) the as-synthesized Cu<sub>2</sub>O grown on Ni foam.

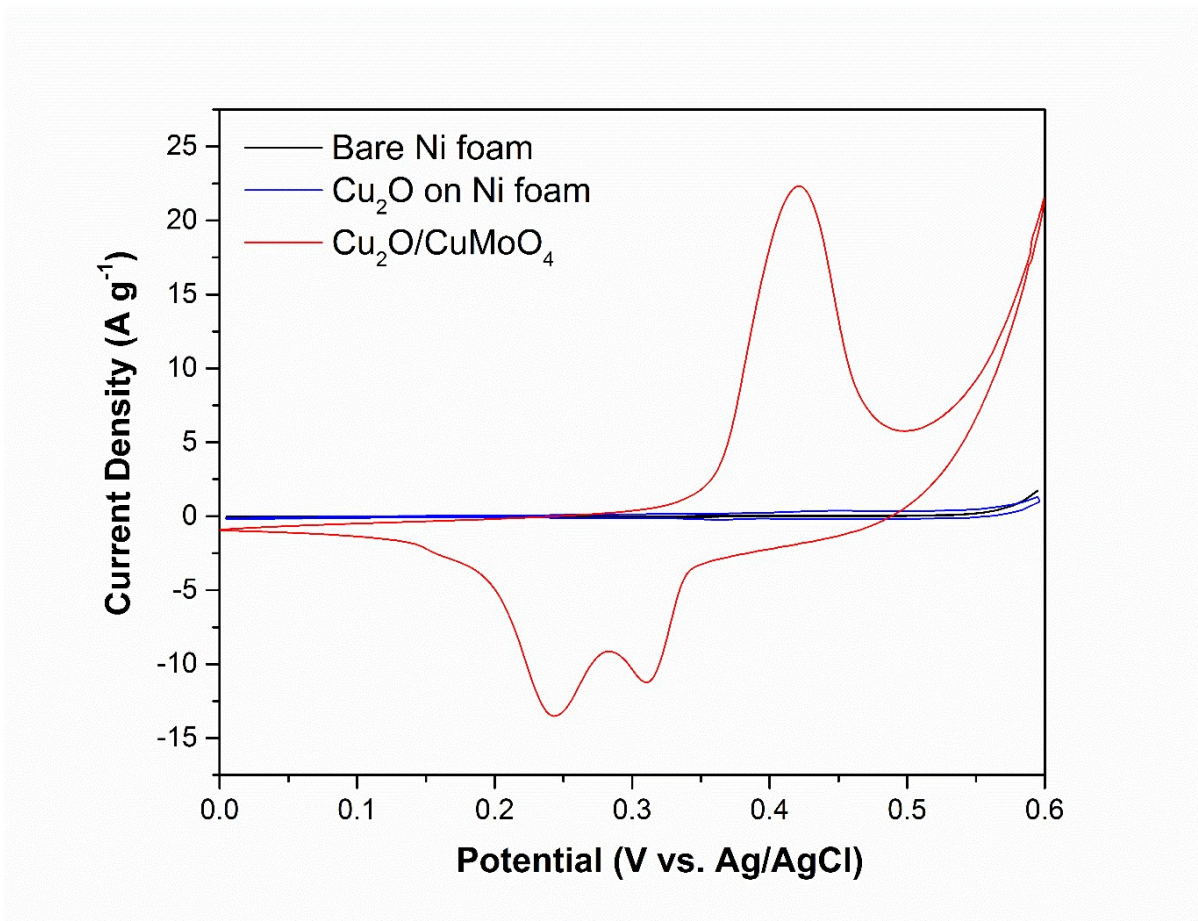

**Fig. S6.** Cyclic voltammograms (CV) of bare Ni foam after annealing in Argon at 450 °C for 2h, Cu<sub>2</sub>O grown on Ni foam and hybrid Cu<sub>2</sub>O/CuMoO<sub>4</sub> nanosheets electrode in a potential range of 0 to 0.6 V at a scan rate of 1 mV s<sup>-1</sup>.

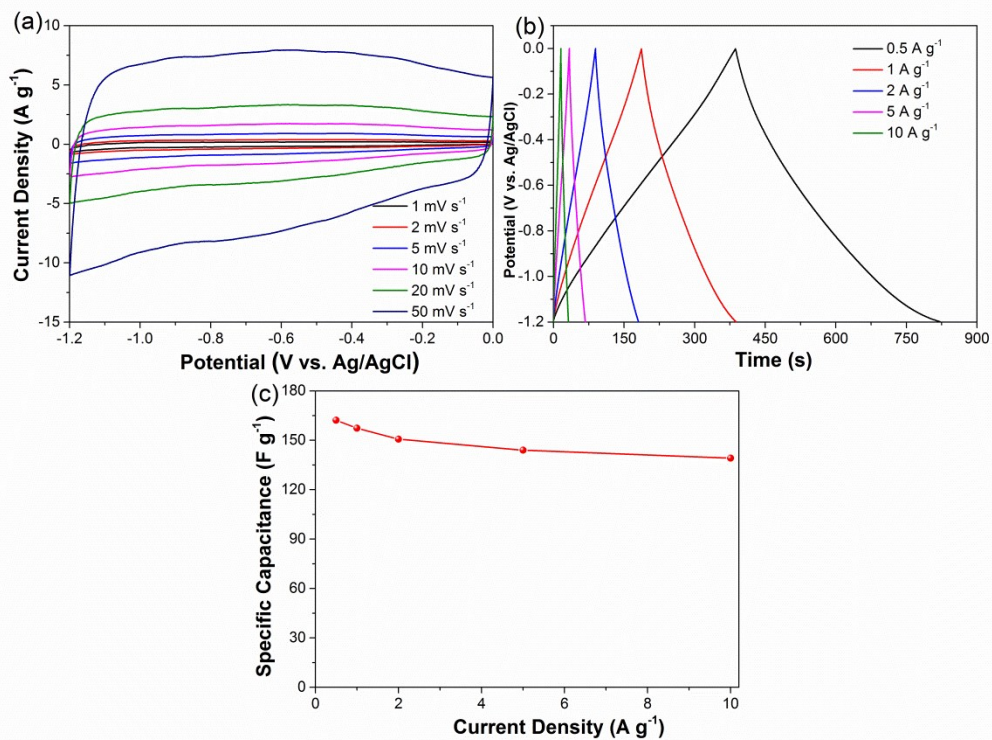

**Fig. S7.** a) CV curves of the AC electrode at various scan rates. b) Galvanostatic charge–discharge curves of the AC electrode at various current densities. c) Specific capacitance at various current densities.



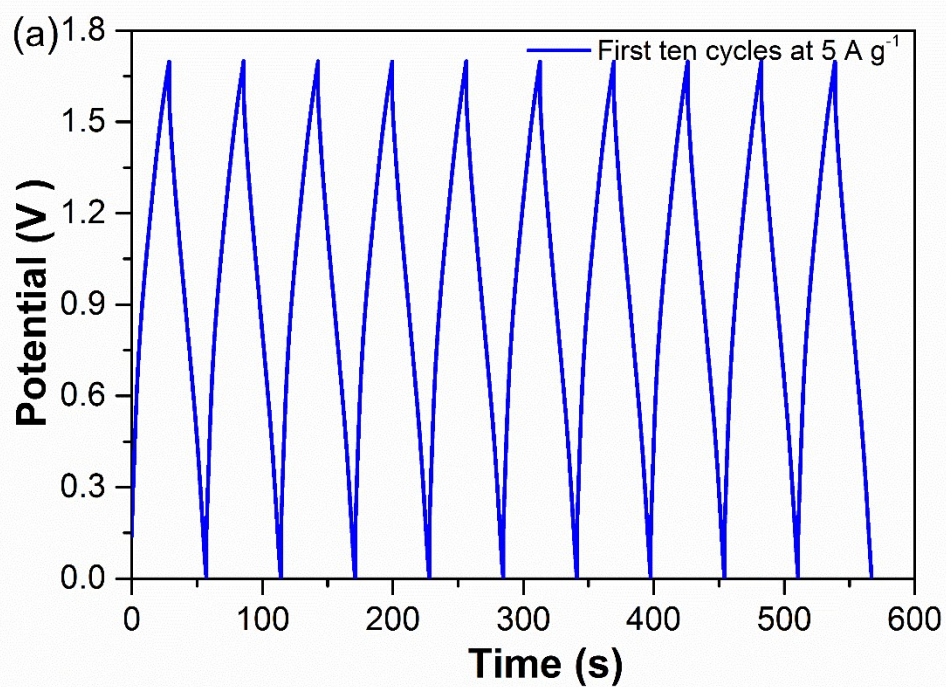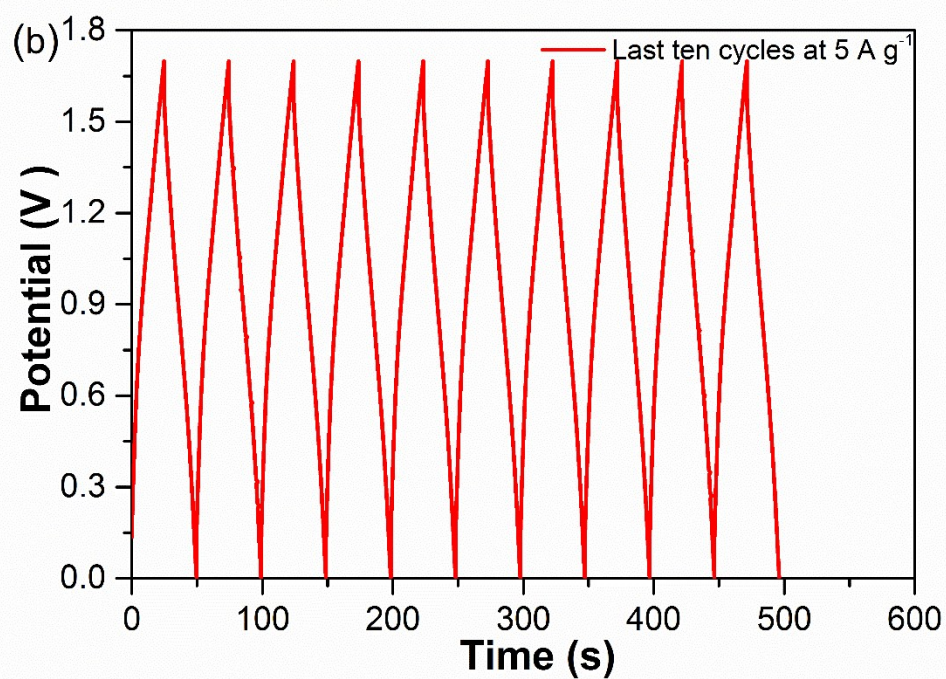

**Fig. S8.** a) First and b) last ten charge-discharge curves of the  $\text{Cu}_2\text{O}/\text{CuMoO}_4//\text{AC}$  asymmetric supercapacitor at a current density of  $5 \text{ A g}^{-1}$ .
